# Supplementary material
Source: ML conference proceedings conference paper supplement (https://proceedings.neurips.cc/paper_files/paper/2023/hash/53e9b4152ca09d5f1228157e752651dd-Abstract.html)
Supplement: Supplementary file 1 [file 53e9b4152ca09d5f1228157e752651dd-Supplemental-Conference.pdf]

428 **A Appendix A**

429 **A.1 Model specification.**

430 Here we provide all details about our model specification. The joint distribution for our model is

$$p(\mathbf{u}_{1:M}, \mathbf{s}_{1:B}, \theta_{\text{dyn}}, \theta_{\text{dec}}) = p(\mathbf{u}_{1:N} | \mathbf{s}_{1:B}, \theta_{\text{dyn}}, \theta_{\text{dec}}) p(\mathbf{s}_{1:B} | \theta_{\text{dyn}}) p(\theta_{\text{dyn}}) p(\theta_{\text{dec}}). \quad (23)$$

431 Next, we specify each component in detail.

432 **Parameter priors.** The parameter priors are isotropic zero-mean multivariate normal distributions:

$$p(\theta_{\text{dyn}}) = \mathcal{N}(\theta_{\text{dyn}} | \mathbf{0}, I), \quad (24)$$

$$p(\theta_{\text{dec}}) = \mathcal{N}(\theta_{\text{dec}} | \mathbf{0}, I), \quad (25)$$

433 where  $\mathcal{N}$  is the normal distribution,  $\mathbf{0}$  is a zero vector, and  $I$  is the identity matrix, both have an  
434 appropriate dimensionality dependent on the number of encoder and dynamics parameters.

435 **Continuity prior.** We define the continuity prior as

$$p(\mathbf{s}_{1:B} | \theta_{\text{dyn}}) = p(\mathbf{s}_1) \prod_{b=2}^B p(\mathbf{s}_b | \mathbf{s}_{b-1}, \theta_{\text{dyn}}), \quad (26)$$

$$= \left[ \prod_{j=1}^N p(\mathbf{s}_1^j) \right] \left[ \prod_{b=2}^B \prod_{j=1}^N p(\mathbf{s}_b^j | \mathbf{s}_{b-1}, \theta_{\text{dyn}}) \right], \quad (27)$$

$$= \left[ \prod_{j=1}^N \mathcal{N}(\mathbf{s}_1^j | \mathbf{0}, I) \right] \left[ \prod_{b=2}^B \prod_{j=1}^N \mathcal{N}(\mathbf{s}_b^j | \mathbf{z}(t_{[b]}, \mathbf{x}_j; t_{[b-1]}, \mathbf{s}_{b-1}, \theta_{\text{dyn}}), \sigma_c^2 I) \right], \quad (28)$$

436 where  $\mathcal{N}$  is the normal distribution,  $\mathbf{0} \in \mathbb{R}^d$  is a zero vector,  $I \in \mathbb{R}^{d \times d}$  is the identity matrix, and  
437  $\sigma_c \in \mathbb{R}$  is the parameter controlling the strength of the prior. Smaller values of  $\sigma_c$  tend to produce  
438 smaller gaps between the sub-trajectories.

**Observation model**

$$p(\mathbf{u}_{1:N} | \mathbf{s}_{1:B}, \theta_{\text{dyn}}, \theta_{\text{dec}}) = \prod_{b=1}^B \prod_{i \in \mathcal{I}_b} \prod_{j=1}^N p(\mathbf{u}_i^j | \mathbf{s}_b, \theta_{\text{dyn}}, \theta_{\text{dec}}) \quad (29)$$

$$= \prod_{b=1}^B \prod_{i \in \mathcal{I}_b} \prod_{j=1}^N p(\mathbf{u}_i^j | g_{\theta_{\text{dec}}}(\mathbf{z}(t_i, \mathbf{x}_j; t_{[b]}, \mathbf{s}_b, \theta_{\text{dyn}}))) \quad (30)$$

$$= \prod_{b=1}^B \prod_{i \in \mathcal{I}_b} \prod_{j=1}^N \mathcal{N}(\mathbf{u}_i^j | g_{\theta_{\text{dec}}}(\mathbf{z}(t_i, \mathbf{x}_j; t_{[b]}, \mathbf{s}_b, \theta_{\text{dyn}})), \sigma_u^2 I), \quad (31)$$

439 where  $\mathcal{N}$  is the normal distribution,  $\sigma_u^2$  is the observation noise variance, and  $I \in \mathbb{R}^{D \times D}$  is the  
440 identity matrix. Note again that  $\mathbf{z}(t_i, \mathbf{x}_j; t_{[b]}, \mathbf{s}_b, \theta_{\text{dyn}})$  above equals the ODE forward solution  
441  $\text{ODESolve}(t_i; t_{[b]}, \mathbf{s}_b, \theta_{\text{dyn}})$  at grid location  $\mathbf{x}_j$ .

442 **A.2 Approximate posterior specification.**

443 Here we provide all details about the approximate posterior. We define the approximate posterior as

$$q(\theta_{\text{dyn}}, \theta_{\text{dec}}, \mathbf{s}_{1:B}) = q(\theta_{\text{dyn}}) q(\theta_{\text{dec}}) q(\mathbf{s}_{1:B}) = q_{\psi_{\text{dyn}}}(\theta_{\text{dyn}}) q_{\psi_{\text{dec}}}(\theta_{\text{dec}}) \prod_{b=1}^B \prod_{j=1}^N q_{\psi_b^j}(\mathbf{s}_b^j). \quad (32)$$

444 Next, we specify each component in detail.

445 **Dynamics parameters posterior.** We define  $q_{\psi_{\text{dyn}}}(\theta_{\text{dyn}})$  as

$$q_{\psi_{\text{dyn}}}(\theta_{\text{dyn}}) = \mathcal{N}(\theta_{\text{dyn}} | \gamma_{\text{dyn}}, \text{diag}(\boldsymbol{\tau}_{\text{dyn}}^2)), \quad (33)$$

446 where  $\gamma_{\text{dyn}}$  and  $\boldsymbol{\tau}_{\text{dyn}}^2$  are vectors with an appropriate dimension (dependent on the number of dynamics  
447 parameters), and  $\text{diag}(\boldsymbol{\tau}_{\text{dyn}}^2)$  is a matrix with  $\boldsymbol{\tau}_{\text{dyn}}^2$  on the diagonal. We define the vector of variational  
448 parameters as  $\boldsymbol{\psi}_{\text{dyn}} = (\gamma_{\text{dyn}}, \boldsymbol{\tau}_{\text{dyn}}^2)$ . We optimize directly over  $\boldsymbol{\psi}_{\text{dyn}}$  and initialize  $\gamma_{\text{dyn}}$  using Xavier  
449 (Glorot and Bengio, 2010) initialization, while  $\boldsymbol{\tau}_{\text{dyn}}$  is initialized with each element equal to  $9 \cdot 10^{-4}$ .

450 **Decoder parameters posterior.** We define  $q_{\psi_{\text{dec}}}(\theta_{\text{dec}})$  as

$$q_{\psi_{\text{dec}}}(\theta_{\text{dec}}) = \mathcal{N}(\theta_{\text{dec}} | \gamma_{\text{dec}}, \text{diag}(\boldsymbol{\tau}_{\text{dec}}^2)), \quad (34)$$

451 where  $\gamma_{\text{dec}}$  and  $\boldsymbol{\tau}_{\text{dec}}^2$  are vectors with an appropriate dimension (dependent on the number of decoder  
452 parameters), and  $\text{diag}(\boldsymbol{\tau}_{\text{dec}}^2)$  is a matrix with  $\boldsymbol{\tau}_{\text{dec}}^2$  on the diagonal. We define the vector of variational  
453 parameters as  $\boldsymbol{\psi}_{\text{dec}} = (\gamma_{\text{dec}}, \boldsymbol{\tau}_{\text{dec}}^2)$ . We optimize directly over  $\boldsymbol{\psi}_{\text{dec}}$  and initialize  $\gamma_{\text{dec}}$  using Xavier  
454 (Glorot and Bengio, 2010) initialization, while  $\boldsymbol{\tau}_{\text{dec}}$  is initialized with each element equal to  $9 \cdot 10^{-4}$ .

455 **Shooting variables posterior.** We define  $q_{\psi_b^j}(\mathbf{s}_b^j)$  as

$$q_{\psi_b^j}(\mathbf{s}_b^j) = \mathcal{N}(\mathbf{s}_b^j | \boldsymbol{\gamma}_b^j, \text{diag}([\boldsymbol{\tau}_b^j]^2))), \quad (35)$$

456 where the vectors  $\boldsymbol{\gamma}_b^j, \boldsymbol{\tau}_b^j \in \mathbb{R}^d$  are returned by the encoder  $h_{\theta_{\text{enc}}}$ , and  $\text{diag}([\boldsymbol{\tau}_b^j]^2)$  is a matrix with  
457  $[\boldsymbol{\tau}_b^j]^2$  on the diagonal. We define the vector of variational parameters as  $\boldsymbol{\psi}_b^j = (\boldsymbol{\gamma}_b^j, [\boldsymbol{\tau}_b^j])$ . Because the  
458 variational inference for the shooting variables is amortized, our model is trained w.r.t. the parameters  
459 of the encoder network,  $\theta_{\text{enc}}$ .

## 460 B Appendix B

### 461 B.1 Derivation of ELBO.

462 For our model and the choice of the approximate posterior the ELBO can be written as

$$\mathcal{L} = \int q(\theta_{\text{dyn}}, \theta_{\text{dec}}, \mathbf{s}_{1:B}) \ln \frac{p(\mathbf{u}_{1:M}, \mathbf{s}_{1:B}, \theta_{\text{dyn}}, \theta_{\text{dec}})}{q(\theta_{\text{dyn}}, \theta_{\text{dec}}, \mathbf{s}_{1:B})} d\theta_{\text{dyn}} d\theta_{\text{dec}} d\mathbf{s}_{1:B} \quad (36)$$

$$= \int q(\theta_{\text{dyn}}, \theta_{\text{dec}}, \mathbf{s}_{1:B}) \ln \frac{p(\mathbf{u}_{1:M} | \mathbf{s}_{1:B}, \theta_{\text{dyn}}, \theta_{\text{dec}}) p(\mathbf{s}_{1:B} | \theta_{\text{dyn}}) p(\theta_{\text{dyn}}) p(\theta_{\text{dec}})}{q(\mathbf{s}_{1:B}) q(\theta_{\text{dyn}}) q(\theta_{\text{dec}})} d\theta_{\text{dyn}} d\theta_{\text{dec}} d\mathbf{s}_{1:B} \quad (37)$$

$$= \int q(\theta_{\text{dyn}}, \theta_{\text{dec}}, \mathbf{s}_{1:B}) \ln p(\mathbf{u}_{1:M} | \mathbf{s}_{1:B}, \theta_{\text{dyn}}, \theta_{\text{dec}}) d\theta_{\text{dyn}} d\theta_{\text{dec}} d\mathbf{s}_{1:B} \quad (38)$$

$$- \int q(\theta_{\text{dyn}}, \theta_{\text{dec}}, \mathbf{s}_{1:B}) \ln \frac{q(\mathbf{s}_{1:B})}{p(\mathbf{s}_{1:B} | \theta_{\text{dyn}})} d\theta_{\text{dyn}} d\theta_{\text{dec}} d\mathbf{s}_{1:B} \quad (39)$$

$$- \int q(\theta_{\text{dyn}}, \theta_{\text{dec}}, \mathbf{s}_{1:B}) \ln \frac{q(\theta_{\text{dyn}})}{p(\theta_{\text{dyn}})} d\theta_{\text{dyn}} d\theta_{\text{dec}} d\mathbf{s}_{1:B} \quad (40)$$

$$- \int q(\theta_{\text{dec}}, \theta_{\text{dec}}, \mathbf{s}_{1:B}) \ln \frac{q(\theta_{\text{dec}})}{p(\theta_{\text{dec}})} d\theta_{\text{dyn}} d\theta_{\text{dec}} d\mathbf{s}_{1:B} \quad (41)$$

$$= \mathcal{L}_1 - \mathcal{L}_2 - \mathcal{L}_3 - \mathcal{L}_4. \quad (42)$$

463 Next, we will look at each term  $\mathcal{L}_i$  separately.

$$\mathcal{L}_1 = \int q(\theta_{\text{dyn}}, \theta_{\text{dec}}, \mathbf{s}_{1:B}) \ln p(\mathbf{u}_{1:M} | \mathbf{s}_{1:B}, \theta_{\text{dyn}}, \theta_{\text{dec}}) d\theta_{\text{dyn}} d\theta_{\text{dec}} d\mathbf{s}_{1:B} \quad (43)$$

$$= \int q(\theta_{\text{dyn}}, \theta_{\text{dec}}, \mathbf{s}_{1:B}) \ln \left[ \prod_{b=1}^B \prod_{i \in \mathcal{I}_b} \prod_{j=1}^N p(\mathbf{u}_i^j | \mathbf{s}_b, \theta_{\text{dyn}}, \theta_{\text{dec}}) \right] d\theta_{\text{dyn}} d\theta_{\text{dec}} d\mathbf{s}_{1:B} \quad (44)$$

$$= \sum_{b=1}^B \sum_{i \in \mathcal{I}_b} \sum_{j=1}^N \int q(\theta_{\text{dyn}}, \theta_{\text{dec}}, \mathbf{s}_{1:B}) \ln \left[ p(\mathbf{u}_i^j | \mathbf{s}_b, \theta_{\text{dyn}}, \theta_{\text{dec}}) \right] d\theta_{\text{dyn}} d\theta_{\text{dec}} d\mathbf{s}_{1:B} \quad (45)$$

$$= \sum_{b=1}^B \sum_{i \in \mathcal{I}_b} \sum_{j=1}^N \int q(\theta_{\text{dyn}}, \theta_{\text{dec}}, \mathbf{s}_b) \ln \left[ p(\mathbf{u}_i^j | \mathbf{s}_b, \theta_{\text{dyn}}, \theta_{\text{dec}}) \right] d\theta_{\text{dyn}} d\theta_{\text{dec}} d\mathbf{s}_b \quad (46)$$

$$= \sum_{b=1}^B \sum_{i \in \mathcal{I}_b} \sum_{j=1}^N \mathbb{E}_{q(\theta_{\text{dyn}}, \theta_{\text{dec}}, \mathbf{s}_b)} \ln \left[ p(\mathbf{u}_i^j | \mathbf{s}_b, \theta_{\text{dyn}}, \theta_{\text{dec}}) \right]. \quad (47)$$

464

$$\mathcal{L}_2 = \int q(\theta_{\text{dyn}}, \theta_{\text{dec}}, \mathbf{s}_{1:B}) \ln \frac{q(\mathbf{s}_{1:B})}{p(\mathbf{s}_{1:B} | \theta_{\text{dyn}})} d\theta_{\text{dyn}} d\theta_{\text{dec}} d\mathbf{s}_{1:B} \quad (48)$$

$$= \int q(\theta_{\text{dyn}}, \theta_{\text{dec}}, \mathbf{s}_{1:B}) \ln \left[ \frac{q(\mathbf{s}_1)}{p(\mathbf{s}_1)} \prod_{b=2}^B \frac{q(\mathbf{s}_b)}{p(\mathbf{s}_b | \mathbf{s}_{b-1}, \theta_{\text{dyn}})} \right] d\theta_{\text{dyn}} d\theta_{\text{dec}} d\mathbf{s}_{1:B} \quad (49)$$

$$= \int q(\theta_{\text{dyn}}, \theta_{\text{dec}}, \mathbf{s}_{1:B}) \ln \left[ \prod_{j=1}^N \frac{q(\mathbf{s}_1^j)}{p(\mathbf{s}_1^j)} \right] d\theta_{\text{dyn}} d\theta_{\text{dec}} d\mathbf{s}_{1:B} \quad (50)$$

$$+ \int q(\theta_{\text{dyn}}, \theta_{\text{dec}}, \mathbf{s}_{1:B}) \ln \left[ \prod_{b=2}^B \prod_{j=1}^N \frac{q(\mathbf{s}_b^j)}{p(\mathbf{s}_b^j | \mathbf{s}_{b-1}, \theta_{\text{dyn}})} \right] d\theta_{\text{dyn}} d\theta_{\text{dec}} d\mathbf{s}_{1:B} \quad (51)$$

$$= \sum_{j=1}^N \int q(\theta_{\text{dyn}}, \theta_{\text{dec}}, \mathbf{s}_{1:B}) \ln \left[ \frac{q(\mathbf{s}_1^j)}{p(\mathbf{s}_1^j)} \right] d\theta_{\text{dyn}} d\theta_{\text{dec}} d\mathbf{s}_{1:B} \quad (52)$$

$$+ \sum_{b=2}^B \int q(\theta_{\text{dyn}}, \theta_{\text{dec}}, \mathbf{s}_{1:B}) \sum_{j=1}^N \ln \left[ \frac{q(\mathbf{s}_b^j)}{p(\mathbf{s}_b^j | \mathbf{s}_{b-1}, \theta_{\text{dyn}})} \right] d\theta_{\text{dyn}} d\theta_{\text{dec}} d\mathbf{s}_{1:B} \quad (53)$$

$$= \sum_{j=1}^N \int q(\mathbf{s}_1^j) \ln \left[ \frac{q(\mathbf{s}_1^j)}{p(\mathbf{s}_1^j)} \right] d\mathbf{s}_1^j \quad (54)$$

$$+ \sum_{b=2}^B \int q(\theta_{\text{dyn}}, \mathbf{s}_{b-1}, \mathbf{s}_b) \sum_{j=1}^N \ln \left[ \frac{q(\mathbf{s}_b^j)}{p(\mathbf{s}_b^j | \mathbf{s}_{b-1}, \theta_{\text{dyn}})} \right] d\theta_{\text{dyn}} d\mathbf{s}_{b-1} d\mathbf{s}_b \quad (55)$$

$$= \sum_{j=1}^N \int q(\mathbf{s}_1^j) \ln \left[ \frac{q(\mathbf{s}_1^j)}{p(\mathbf{s}_1^j)} \right] d\mathbf{s}_1^j \quad (56)$$

$$+ \sum_{b=2}^B \int q(\theta_{\text{dyn}}, \mathbf{s}_{b-1}) \sum_{j=1}^N \left[ \int q(\mathbf{s}_b^j) \ln \frac{q(\mathbf{s}_b^j)}{p(\mathbf{s}_b^j | \mathbf{s}_{b-1}, \theta_{\text{dyn}})} d\mathbf{s}_b^j \right] d\theta_{\text{dyn}} d\mathbf{s}_{b-1} \quad (57)$$

$$= \sum_{j=1}^N \text{KL} \left( q(\mathbf{s}_1^j) \| p(\mathbf{s}_1^j) \right) + \sum_{b=2}^B \mathbb{E}_{q(\theta_{\text{dyn}}, \mathbf{s}_{b-1})} \left[ \sum_{j=1}^N \text{KL} \left( q(\mathbf{s}_b^j) \| p(\mathbf{s}_b^j | \mathbf{s}_{b-1}, \theta_{\text{dyn}}) \right) \right], \quad (58)$$

465 where KL is Kullback–Leibler (KL) divergence. Both of the KL divergences above have a closed  
466 form but the expectation w.r.t.  $q(\theta_{\text{dyn}}, \mathbf{s}_{b-1})$  does not.

$$\mathcal{L}_3 = \text{KL}(q(\theta_{\text{dyn}}) \| p(\theta_{\text{dyn}})), \quad \mathcal{L}_4 = \text{KL}(q(\theta_{\text{dec}}) \| p(\theta_{\text{dec}})). \quad (59)$$

467 **B.2 Computation of ELBO.**

468 We compute the ELBO using the following algorithm:

- 469 1. Sample  $\theta_{\text{dyn}}, \theta_{\text{dec}}$  from  $q_{\psi_{\text{dyn}}}(\theta_{\text{dyn}}), q_{\psi_{\text{dec}}}(\theta_{\text{dec}})$ .  
 470 2. Sample  $\mathbf{s}_{1:B}$  by sampling each  $\mathbf{s}_b^j$  from  $q_{\psi_b^j}(\mathbf{s}_b^j)$  with  $\psi_b^j = h_{\theta_{\text{enc}}}(\mathbf{u}[t_{[b]}, \mathbf{x}_j])$ .  
 471 3. Compute  $\mathbf{u}_{1:M}$  from  $\mathbf{s}_{1:B}$  as in Equations 14-16.  
 472 4. Compute ELBO  $\mathcal{L}$  (KL terms are computed in closed form, for expectations we use Monte  
 473 Carlo integration with one sample).

474 Sampling is done using reparametrization to allow unbiased gradients w.r.t. the model parameters.

475 **C Appendix C**

476 **C.1 Datasets.**

477 **SHALLOW WATER.** The shallow water equations are a system of partial differential equations  
 478 (PDEs) that simulate the behavior of water in a shallow basin. These equations are effectively a  
 479 depth-integrated version of the Navier-Stokes equations, assuming the horizontal length scale is  
 480 significantly larger than the vertical length scale. Given these assumptions, they provide a model  
 481 for water dynamics in a basin or similar environment, and are commonly utilized in predicting the  
 482 propagation of water waves, tides, tsunamis, and coastal currents. The state of the system modeled  
 483 by these equations consists of the wave height  $h(t, x, y)$ , velocity in the  $x$ -direction  $u(t, x, y)$  and  
 484 velocity in the  $y$ -direction  $v(t, x, y)$ . Given an initial state  $(h_0, u_0, v_0)$ , we solve the PDEs on a  
 485 spatial domain  $\Omega$  over time interval  $[0, T]$ . The shallow water equations are defined as:

$$\frac{\partial h}{\partial t} + \frac{\partial(hu)}{\partial x} + \frac{\partial(hv)}{\partial y} = 0, \quad (60)$$

$$\frac{\partial u}{\partial t} + u \frac{\partial u}{\partial x} + v \frac{\partial u}{\partial y} + g \frac{\partial h}{\partial x} = 0, \quad (61)$$

$$\frac{\partial v}{\partial t} + u \frac{\partial v}{\partial x} + v \frac{\partial v}{\partial y} + g \frac{\partial h}{\partial y} = 0, \quad (62)$$

486 where  $g$  is the gravitational constant.

487 We set the spatial domain  $\Omega$  to be a unit square and use periodic boundary conditions. We set  $T = 0.1$ .  
 488 The solution is evaluated at randomly selected spatial locations and time points. We use 1089 spatial  
 489 locations and 25 time points. The spatial and temporal grids are the same for all trajectories. Since we  
 490 are dealing with partially-observed cases, we assume that we observe only the wave height  $h(t, x, y)$ .

491 For each trajectory, we start with zero initial velocities and the initial height  $h_0(x, y)$  generated as:

$$\tilde{h}_0(x, y) = \sum_{k,l=-N}^N \lambda_{kl} \cos(2\pi(kx + ly)) + \gamma_{kl} \sin(2\pi(kx + ly)), \quad (63)$$

$$h_0(x, y) = 1 + \frac{\tilde{h}_0(x, y) - \min(\tilde{h}_0)}{\max(\tilde{h}_0) - \min(\tilde{h}_0)}, \quad (64)$$

492 where  $N = 3$  and  $\lambda_{kl}, \gamma_{kl} \sim \mathcal{N}(0, 1)$ .

493 The datasets used for training, validation, and testing contain 60, 20, and 20 trajectories, respectively.

494 We use scikit-fdiff (Cellier, 2019) to solve the PDEs.

495 **NAVIER-STOKES.** For this dataset we model the propagation of a scalar field (e.g., smoke concen-  
 496 tration) in a fluid (e.g., air). The modeling is done by coupling the Navier-Stokes equations with the  
 497 Boussinesq buoyancy term and the transport equation to model the propagation of the scalar field.  
 498 The state of the system modeled by these equations consists of the scalar field  $c(t, x, y)$ , velocity in  
 499  $x$ -direction  $u(t, x, y)$ , velocity in  $y$ -direction  $v(t, x, y)$ , and pressure  $p(t, x, y)$ . Given an initial state

500  $(c_0, u_0, v_0, p_0)$ , we solve the PDEs on a spatial domain  $\Omega$  over time interval  $[0, T]$ . The Navier-Stokes  
 501 equations with the transport equation are defined as:

$$\frac{\partial u}{\partial x} + \frac{\partial v}{\partial y} = 0, \quad (65)$$

$$\frac{\partial u}{\partial t} + u \frac{\partial u}{\partial x} + v \frac{\partial u}{\partial y} = -\frac{\partial p}{\partial x} + \nu \left( \frac{\partial^2 u}{\partial x^2} + \frac{\partial^2 u}{\partial y^2} \right), \quad (66)$$

$$\frac{\partial v}{\partial t} + u \frac{\partial v}{\partial x} + v \frac{\partial v}{\partial y} = -\frac{\partial p}{\partial y} + \nu \left( \frac{\partial^2 v}{\partial x^2} + \frac{\partial^2 v}{\partial y^2} \right) + c, \quad (67)$$

$$\frac{\partial c}{\partial t} = -u \frac{\partial c}{\partial x} - v \frac{\partial c}{\partial y} + \nu \left( \frac{\partial^2 c}{\partial x^2} + \frac{\partial^2 c}{\partial y^2} \right), \quad (68)$$

502 where  $\nu = 0.002$ .

503 We set the spatial domain  $\Omega$  to be a unit square and use periodic boundary conditions. We set  $T = 2.0$ ,  
 504 but drop the first 0.5 seconds due to slow dynamics during this time period. The solution is evaluated  
 505 at randomly selected spatial locations and time points. We use 1089 spatial locations and 25 time  
 506 points. The spatial and temporal grids are the same for all trajectories. Since we are dealing with  
 507 partially-observed cases, we assume that we observe only the scalar field  $c(t, x, y)$ .

508 For each trajectory, we start with zero initial velocities and pressure, and the initial scalar field  $c_0(x, y)$   
 509 is generated as:

$$\tilde{c}_0(x, y) = \sum_{k, l=-N}^N \lambda_{kl} \cos(2\pi(kx + ly)) + \gamma_{kl} \sin(2\pi(kx + ly)), \quad (69)$$

$$c_0(x, y) = \frac{\tilde{c}_0(x, y) - \min(\tilde{c}_0)}{\max(\tilde{c}_0) - \min(\tilde{c}_0)}, \quad (70)$$

510 where  $N = 2$  and  $\lambda_{kl}, \gamma_{kl} \sim \mathcal{N}(0, 1)$ .

511 The datasets used for training, validation, and testing contain 60, 20, and 20 trajectories, respectively.

512 We use PhiFlow (Holl et al., 2020) to solve the PDEs.

513 **SCALAR FLOW.** This dataset, proposed by Eckert et al. (2019), consists  
 514 of observations of smoke plumes rising in hot air. The observations are post-  
 515 processed camera images of the smoke plumes taken from multiple views. For  
 516 simplicity, we use only the front view. The dataset contains 104 trajectories,  
 517 where each trajectory has 150 time points and each image has the resolution  
 518  $1080 \times 1920$ .

519 To reduce dimensionality of the observations we sub-sample the original spatial  
 520 and temporal grids. For the temporal grid, we remove the first 50 time points,  
 521 which leaves 100 time points, and then take every 4th time point, thus leaving  
 522 20 time points in total. The original  $1080 \times 1920$  spatial grid is first down-  
 523 sampled by a factor of 9 giving a new grid with resolution  $120 \times 213$ , and then  
 524 the new grid is further sub-sampled based on the smoke density at each node.  
 525 In particular, we compute the average smoke density at each node (averaged  
 526 over time), and then sample the nodes without replacement with the probability  
 527 proportional to the average smoke density (thus, nodes that have zero density  
 528 most of the time are not selected). See example of a final grid in Figure 11.  
 529 This gives a new grid with 1089 nodes.

530 We further smooth the observations by applying Gaussian smoothing with the  
 531 standard deviation of 1.5 (assuming domain size  $120 \times 213$ ).

532 We use the first 60 trajectories for training, next 20 for validation and next 20 for testing.

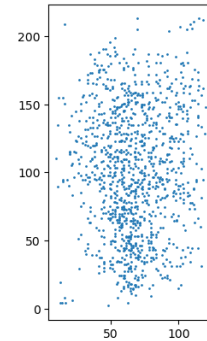

Figure 11: Spatial grid used for SCALAR FLOW dataset.

533 **C.2 Model architecture and hyper-parameters.**

534 **Dynamics function.** For all datasets we define  $F_{\theta_{\text{dyn}}}$  as an MLP. For SHALLOW WATER/NAVIER-  
 535 STOKES/SCALAR FLOW we use 1/3/3 hidden layers with the size of 1024/512/512, respectively. We  
 536 use ReLU nonlinearities.

537 **Observation function.** For all datasets we define  $g_{\theta_{\text{dec}}}$  as a selector function which takes the latent  
 538 state  $z(t, x) \in \mathbb{R}^d$  and returns its first component.

539 **Encoder.** Our encoder  $h_{\theta_{\text{enc}}}$  consists of three function:  $h_{\theta_{\text{spatial}}}$ ,  $h_{\theta_{\text{temporal}}}$ , and  $h_{\theta_{\text{read}}}$ . The spatial  
 540 aggregation function  $h_{\theta_{\text{spatial}}}$  is a linear mapping to  $\mathbb{R}^{128}$ . The temporal aggregation function  $h_{\theta_{\text{temporal}}}$   
 541 is a stack of transformer layers with temporal attention and continuous relative positional encodings  
 542 (Iakovlev et al., 2023). For all datasets, we set the number of transformer layers to 6. Finally, the  
 543 variational parameter readout function  $h_{\theta_{\text{read}}}$  is a mapping defined as

$$\psi_b^j = h_{\theta_{\text{read}}}(\alpha_{[b]}^T) = \begin{pmatrix} \gamma_b^j \\ \tau_b^j \end{pmatrix} = \begin{pmatrix} \text{Linear}(\alpha_{[b]}^T) \\ \exp(\text{Linear}(\alpha_{[b]}^T)) \end{pmatrix}, \quad (71)$$

544 where Linear is a linear layer (different for each line), and  $\gamma_b^j$  and  $\tau_b^j$  are the variational parameters  
 545 discussed in Appendix A.

546 **Spatial and temporal neighborhoods.** We use the same spatial neighborhoods  $\mathcal{N}_S(\mathbf{x})$  for both the  
 547 encoder and the dynamics function. We define  $\mathcal{N}_S(\mathbf{x})$  as the set of points consisting of the point  $\mathbf{x}$   
 548 and points on two concentric circles centered at  $\mathbf{x}$ , with radii  $r$  and  $r/2$ , respectively. Each circle  
 549 contains 8 points spaced 45 degrees apart (see Figure 12 (right)). The radius  $r$  is set to 0.1. For  
 550 SHALLOW WATER/NAVIER-STOKES/SCALAR FLOW the size of temporal neighborhood ( $\delta_T$ ) is set  
 551 to 0.1/0.1/0.2, respectively.

552 **Multiple Shooting.** For SHALLOW WATER/NAVIER-STOKES/SCALAR FLOW we split the full  
 553 training trajectories into 4/4/19 sub-trajectories, or, equivalently, have the sub-trajectory length of  
 554 6/6/2.

555 **C.3 Training, validation, and testing setup.**

556 **Data preprocessing.** We scale the temporal grids, spatial grids, and observations to be within the  
 557 interval  $[0, 1]$ .

558 **Training.** We train our model for 20000 iterations using Adam (Kingma and Ba, 2017) optimizer  
 559 with constant learning rate  $3\text{e-}4$  and linear warmup for 200 iterations. The latent spatiotemporal  
 560 dynamics are simulated using differentiable ODE solvers from the torchdiffeq package (Chen, 2018)  
 561 (we use dopri5 with  $\text{rtol}=1\text{e-}3$ ,  $\text{atol}=1\text{e-}4$ , no adjoint). The batch size is 1.

562 **Validation.** We use validation set to track the performance of our model during training and save the  
 563 parameters that produce the best validation performance. As performance measure we use the mean  
 564 absolute error at predicting the full validation trajectories given some number of initial observations.  
 565 For SHALLOW WATER/NAVIER-STOKES/SCALAR FLOW we use the first 5/5/10 observations. The  
 566 predictions are made by taking one sample from the posterior predictive distribution (see Appendix  
 567 C.4 for details).

568 **Testing.** Testing is done similarly to validation, except that as the prediction we use an estimate of  
 569 the expected value of the posterior predictive distribution (see Appendix C.4 for details).

570 **C.4 Forecasting.**

571 Given initial observations  $\tilde{\mathbf{u}}_{1:m}$  at time points  $t_{1:m}$ , we predict the future observation  $\tilde{\mathbf{u}}_n$  at a time  
 572 point  $t_n > t_m$  as the expected value of the approximate posterior predictive distribution:

$$p(\tilde{\mathbf{u}}_n | \tilde{\mathbf{u}}_{1:m}, \mathbf{u}_{1:M}) \approx \int p(\tilde{\mathbf{u}}_n | \tilde{\mathbf{s}}_m, \theta_{\text{dyn}}, \theta_{\text{dec}}) q(\tilde{\mathbf{s}}_m) q(\theta_{\text{dyn}}) q(\theta_{\text{dec}}) d\tilde{\mathbf{s}}_m d\theta_{\text{dyn}} d\theta_{\text{dec}}. \quad (72)$$

573 The expected value is estimated via Monte Carlo integration, so the algorithm for predicting  $\tilde{\mathbf{u}}_n$  is:

- 574 1. Sample  $\theta_{\text{dyn}}, \theta_{\text{dec}}$  from  $q(\theta_{\text{dyn}}), q(\theta_{\text{dec}})$ .
- 575 2. Sample  $\tilde{\mathbf{s}}_m$  from  $q(\tilde{\mathbf{s}}_m) = \prod_{j=1}^N q_{\psi_m^j}(\tilde{\mathbf{s}}_m^j)$ , where the variational parameters  $\psi_m^j$  are given
- 576 by the encoder  $h_{\theta_{\text{enc}}}$  operating on the initial observations  $\tilde{\mathbf{u}}_{1:m}$  as  $\psi_m^j = h_{\theta_{\text{enc}}}(\tilde{\mathbf{u}}[t_m, \mathbf{x}_j])$ .
- 577 3. Compute the latent state  $\tilde{\mathbf{z}}(t_n) = \mathbf{z}(t_n; t_m, \tilde{\mathbf{s}}_m, \theta_{\text{dyn}})$ .
- 578 4. Sample  $\tilde{\mathbf{u}}_n$  by sampling each  $\tilde{u}_n^j$  from  $\mathcal{N}(\tilde{u}_n^j | g_{\theta_{\text{dec}}}(\tilde{\mathbf{z}}(t_n, \mathbf{x}_j)), \sigma_u^2 I)$ .
- 579 5. Repeat steps 1-4  $n$  times and average the predictions (we use  $n = 10$ ).

## 580 C.5 Model comparison setup.

581 **DINo.** We use the official implementation of DINo (Yin et al., 2023). The encoder is an MLP  
 582 with 3 hidden layers, 512 neurons each, and Swish non-linearities. The code dimension is 100. The  
 583 dynamics function is an MLP with 3 hidden layers, 512 neurons each, and Swish non-linearities. The  
 584 decoder has 3 layers and 64 channels.

585 **MAGNet.** We use the official implementation of MAGNet (Boussif et al., 2022). We use the graph  
 586 neural network variant of the model. The number of message-passing steps is 5. All MLPs have 4  
 587 layers with 128 neurons each in each layer. The latent state dimension is 128.

## 588 D Appendix D

### 589 D.1 Spatiotemporal neighborhood shapes and sizes.

590 Here we investigate the effect of changing the shape and size of spatial and temporal neighborhoods  
 591 used by the encoder and dynamics functions. We use the default hyperparameters discussed in  
 592 Appendix C and change only the neighborhood shape or size. A neighborhood size of zero implies  
 593 no spatial/temporal aggregation.

594 Initially, we use the original circular neighborhood displayed in Figure 12 for both encoder and  
 595 dynamics function and change only its size (radius). The results are presented in Figures 13a and 13b.  
 596 In Figure 13a, it is surprising to see very little effect from changing the encoder’s spatial neighborhood  
 597 size. A potential explanation is that the dynamics function shares the spatial aggregation task with the  
 598 encoder. However, the results in Figure 13b are more intuitive, displaying a U-shaped curve for the  
 599 test MAE, indicating the importance of using spatial neighborhoods of appropriate size. Interestingly,  
 600 the best results tend to be achieved with relatively large neighborhood sizes. Similarly, Figure 13c  
 601 shows U-shaped curves for the encoder’s temporal neighborhood size, suggesting that latent state  
 602 inference benefits from utilizing local temporal information.

603 We then examine the effect of changing the shape of the dynamics function’s spatial neighborhood.  
 604 We use  $n$ circle neighborhoods, which consist of  $n$  equidistant concentric circular neighborhoods (see  
 605 examples in Figure 12). Effectively, we maintain a fixed neighborhood size while altering its density.  
 606 The results can be seen in Figure 14. We find that performance does not significantly improve when  
 607 using denser (and presumably more informative) spatial neighborhoods, indicating that accurate  
 608 predictions only require a relatively sparse neighborhood with appropriate size.

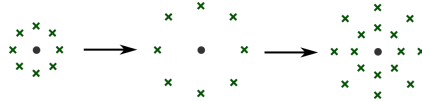

Figure 12: **Left:** original circular neighborhood (1circle). **Center:** circular neighborhood with increased size. **Right:** circular neighborhood of a different shape (2circle).

### 609 D.2 Multiple shooting.

610 Here we demonstrate the effect of using multiple shooting for model training. In Figure 15 (left), we  
 611 vary the sub-trajectory length (longer sub-trajectories imply more difficult training) and plot the test  
 612 errors for each sub-trajectory length. We observe that in all cases, the best results are achieved when  
 613 the sub-trajectory length is considerably smaller than the full trajectory length. In Figure 15 (right)

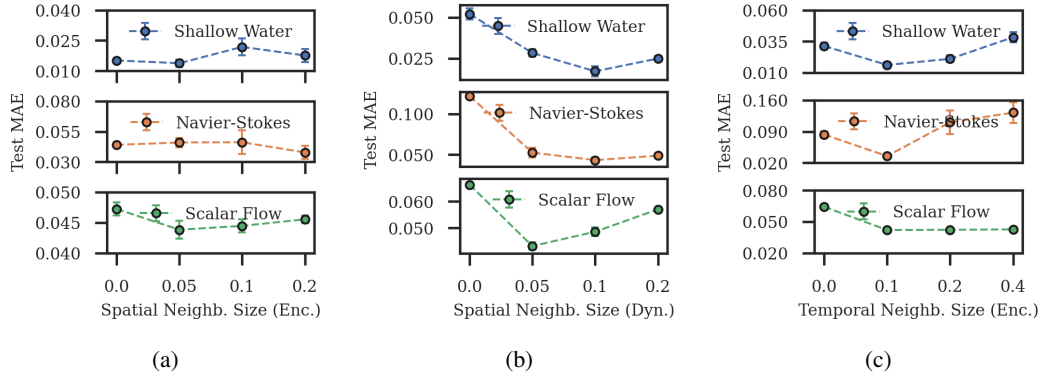

Figure 13: (a),(b): Test MAE vs spatial neighborhood sizes of the encoder and dynamics function, respectively. (c): Test MAE vs temporal neighborhood size of the encoder. Note that the spatial and temporal domains are normalized, so their largest size in any dimension is 1.

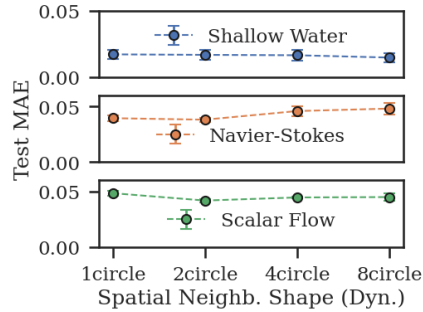

Figure 14: Test MAE vs spatial neighborhood shape.

614 we further show the training times, and as can be seen multiple shooting allows to noticeably reduce  
 615 the training times.

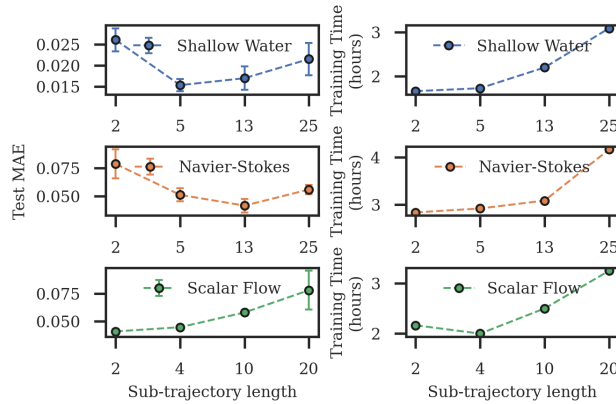

Figure 15: Test MAE vs training sub-trajectory length.

615

## 616 E Appendix E

617 **Noisy Data.** Here we show the effect of observation noise on our model and compare the results  
 618 against other models. We train all models with data noise of various strengths, and then compute test  
 619 MAE on noiseless data (we still use noisy data to infer the initial state at test time). Figure 16 shows



620 that our model can manage noise strength up to 0.1 without significant drops in performance. Note that all observations are in the range  $[0, 1]$ .

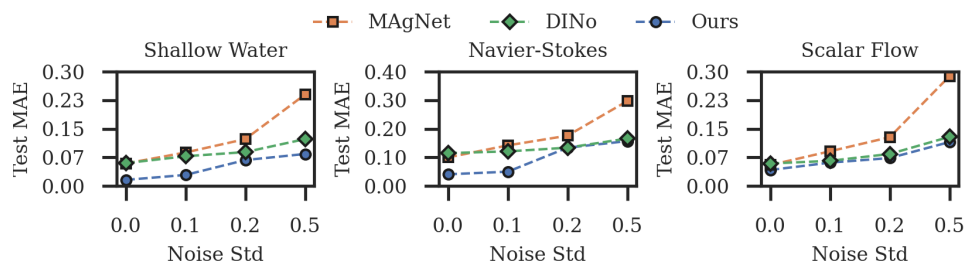

Figure 16: Test MAE vs observation noise  $\sigma_u$ .

621
